# Supplementary material
Source: Springer Nature journal article supplement (https://www.springermedizin.de/resource/supplementary/12939_2013_405_MOESM1_ESM.pdf/9551094)

**(a)** Socioeconomic category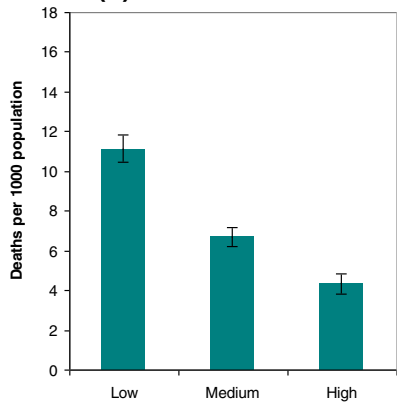**(b)** Indigenous status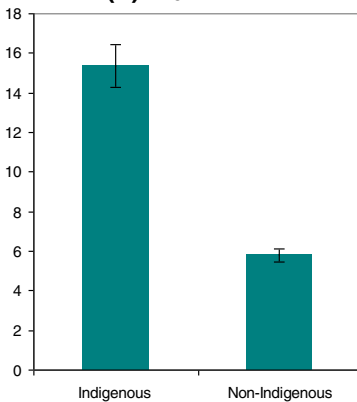**(c)** Remoteness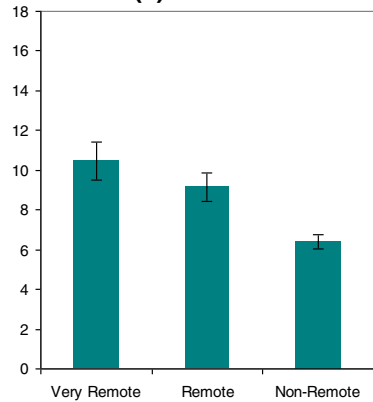**(d)** Socioeconomic Category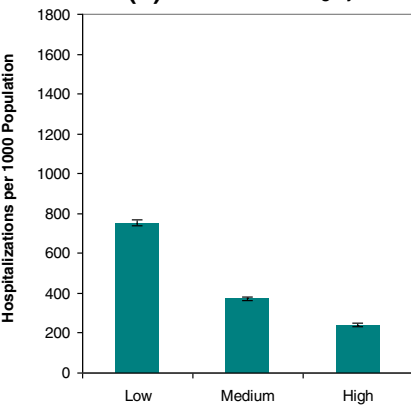**(e)** Indigenous status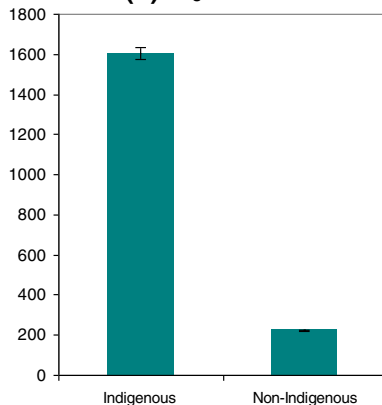**(f)** Remoteness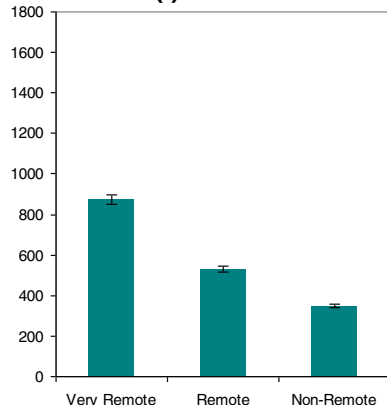

Supplement: MOESM1 [file 9551094]
